# Supplementary material for: A promising approach for screening pulmonary hypertension based on frontal chest radiographs using deep learning: A retrospective study
Source: PubMed Central journal article supplement (PMC7380616; doi:10.1371/journal.pone.0236378), 2020-07-24
Supplement: pone.0236378.s001.pdf [file pone.0236378.s001.pdf]

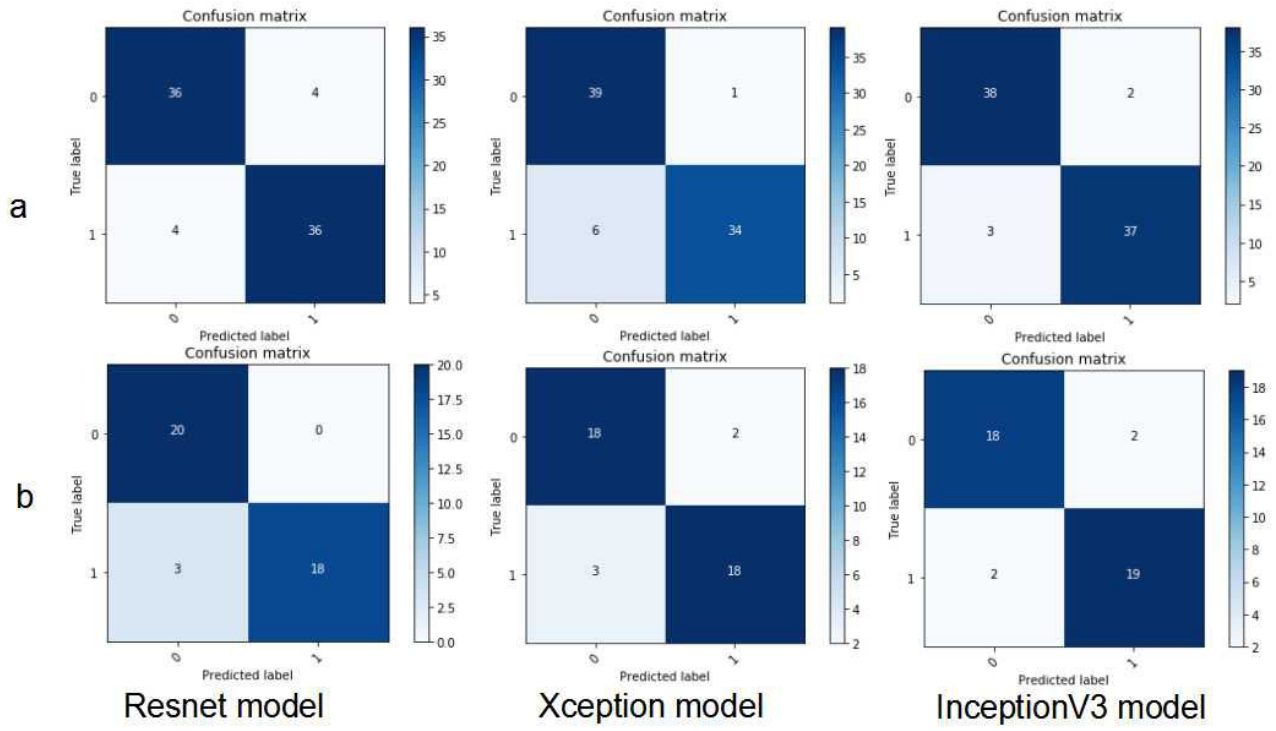

**S1 Fig. Confusion matrix of different CNN models in internal and external test.**
